# Supplementary material for: Laser power and high-temperature dependent Raman studies of layered bismuth and copper-based oxytellurides for optoelectronic applications
Source: Royal Society of Chemistry journal article supplement (doi:10.1039/d4cp00562g), 2024-01-01
Supplement: d4cp00562g1.pdf [file d4cp00562g1.pdf]

## Supporting Information

# Laser power and high-temperature dependent Raman study of layered bismuth and copper-based oxytellurides for optoelectronic applications

*Prabhukrupa C. Kumar<sup>1</sup>, Subrata Senapati<sup>1\*</sup>, Monalisa Pradhan<sup>2</sup>, Gopal K. Pradhan<sup>2</sup>, Ramakanta Naik<sup>1\*</sup>*

<sup>1</sup> Department of Engineering and Materials Physics, Institute of Chemical Technology-Indian Oil Odisha Campus, Bhubaneswar, 751013, India

<sup>2</sup> Department of Physics, School of Applied Science, KIIT Deemed to be University, Bhubaneswar, 751024, India

\*Email: [subrata.uu@gmail.com](mailto:subrata.uu@gmail.com)

[ramakanta.naik@gmail.com](mailto:ramakanta.naik@gmail.com)

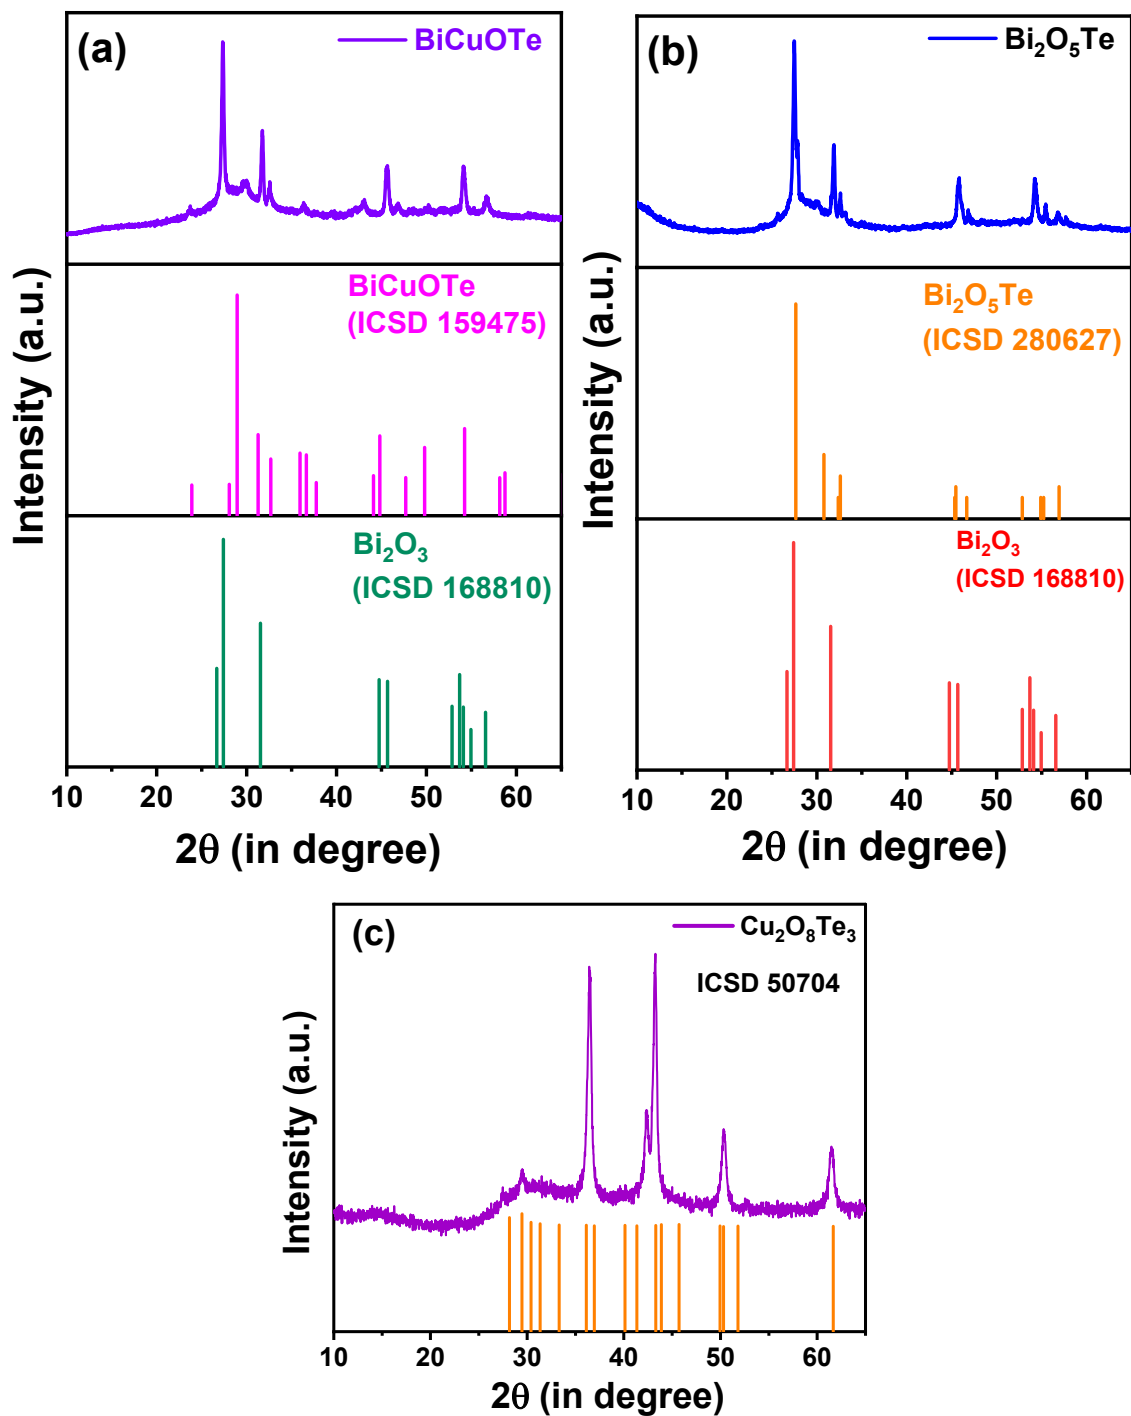

**Fig. S1** XRD pattern with the respective matched ICSD cards for (a) BiCuOTe, (b) Bi<sub>2</sub>O<sub>5</sub>Te and (c) Cu<sub>2</sub>O<sub>8</sub>Te<sub>3</sub> samples.

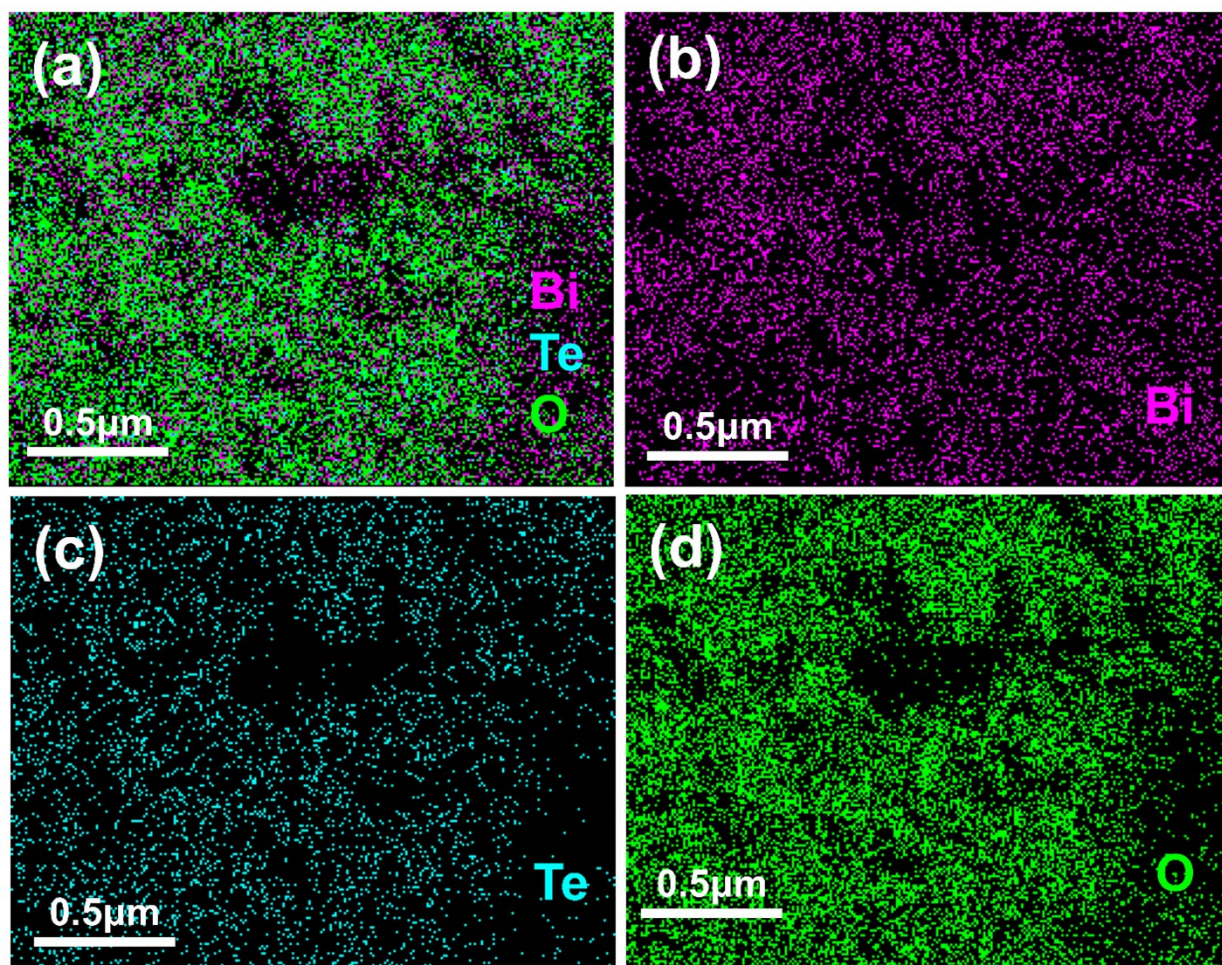

**Fig. S2** (a) Combined elemental mapping of the Bi<sub>2</sub>O<sub>5</sub>Te nanosheets and (b-d) elemental mapping of the individual Bi, O, and Te elements.

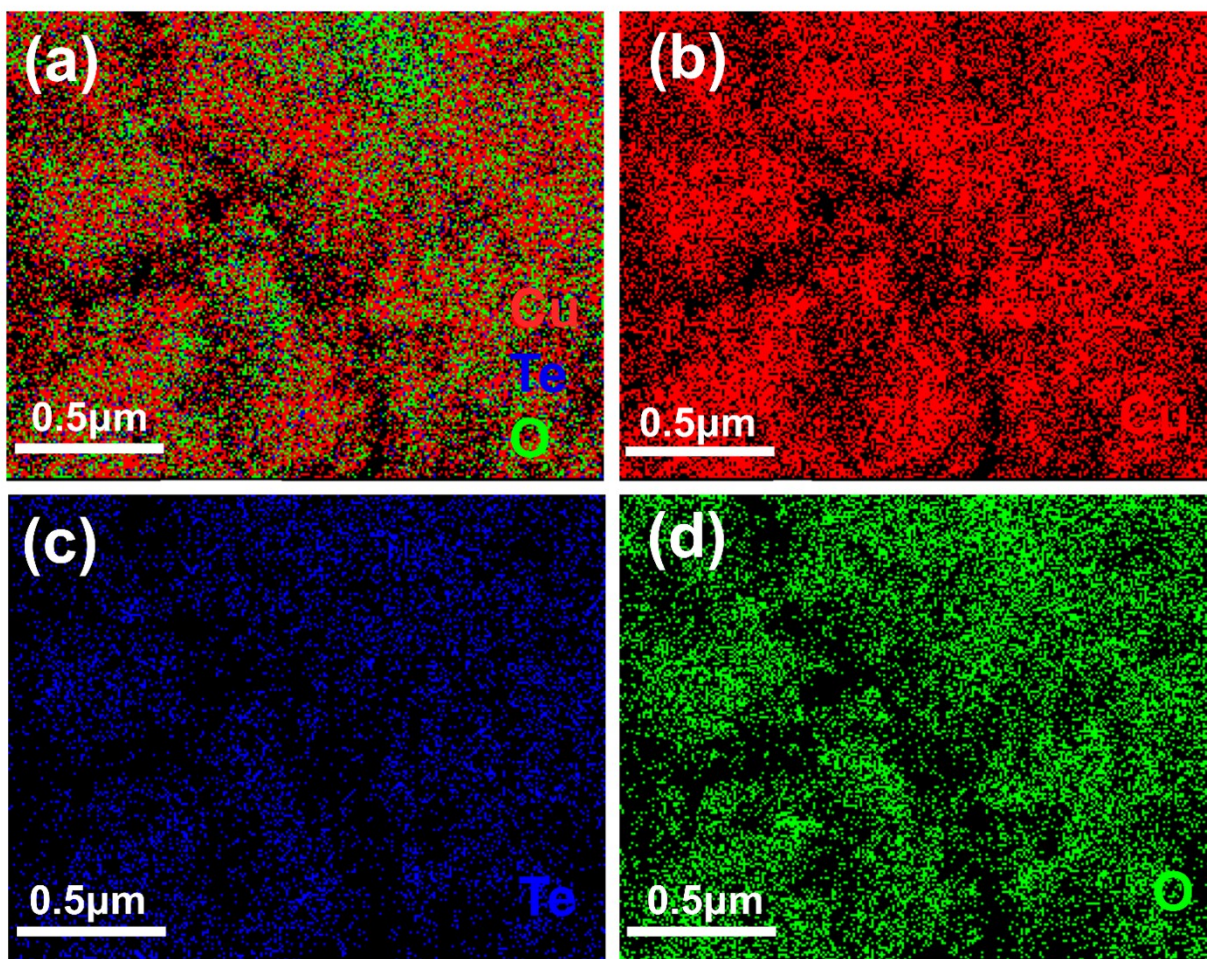

**Fig. S3** (a) Combined elemental mapping of the  $\text{Cu}_2\text{O}_8\text{T}_3$  NS and (b-d) elemental mapping of the individual Cu, Te, and O elements.

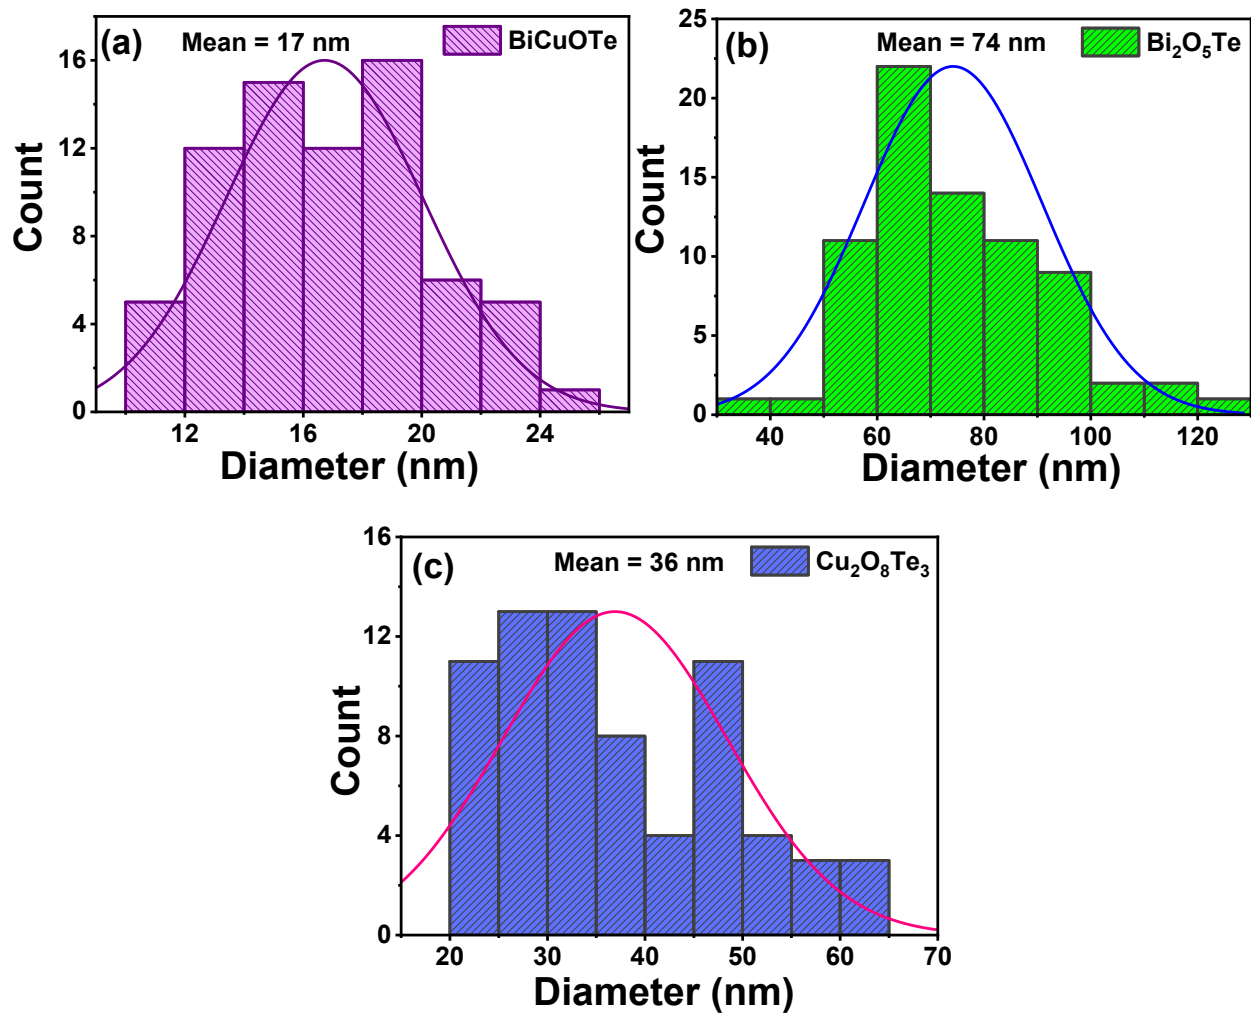

**Fig. S4** Particle size distribution histogram of (a) BiCuOTe, (b) Bi<sub>2</sub>O<sub>5</sub>Te, and (c) Cu<sub>2</sub>O<sub>8</sub>Te<sub>3</sub> samples.

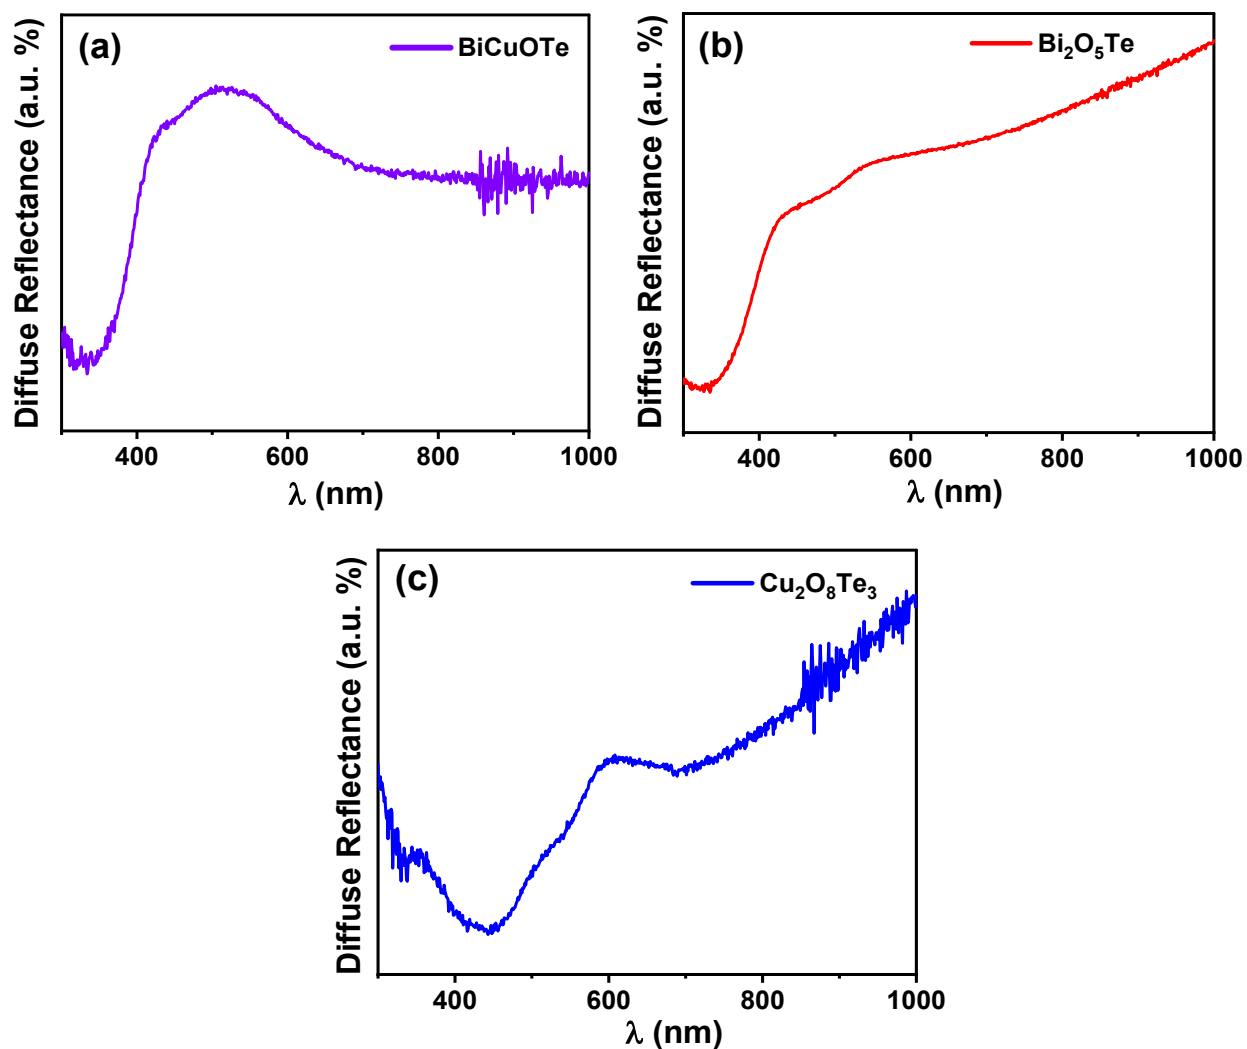

Fig. S5 Diffuse reflectance spectra of (a) BiCuOTe, (b) Bi<sub>2</sub>O<sub>5</sub>Te, and (c) Cu<sub>2</sub>O<sub>8</sub>Te<sub>3</sub> powder sample.

Table S1 Structural parameters obtained from XRD peak analysis.

| Samples                                        | Average Crystallite Size (D) (nm) | Dislocation density( $\delta$ ) (nm <sup>2</sup> ) | Lattice Strain ( $\epsilon$ ) |
|------------------------------------------------|-----------------------------------|----------------------------------------------------|-------------------------------|
| BiCuOTe                                        | 20.36                             | 0.00347                                            | 0.00539                       |
| Bi <sub>2</sub> O <sub>5</sub> Te              | 20.18                             | 0.00537                                            | 0.00539                       |
| Cu <sub>2</sub> O <sub>8</sub> Te <sub>3</sub> | 13.98                             | 0.00560                                            | 0.00735                       |

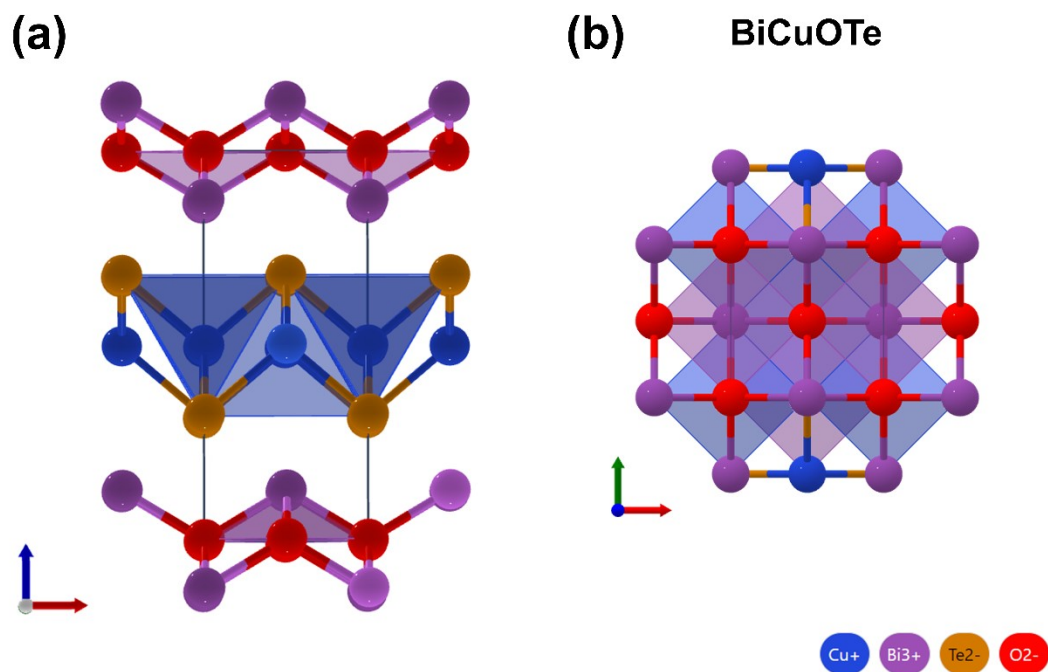

**Fig. S6** Atomic configuration of BiCuOTe tetragonal crystal lattice system (a) side view and (b) top view with P4/nmm space group where the solid-line box shows the unit cell.<sup>1</sup>

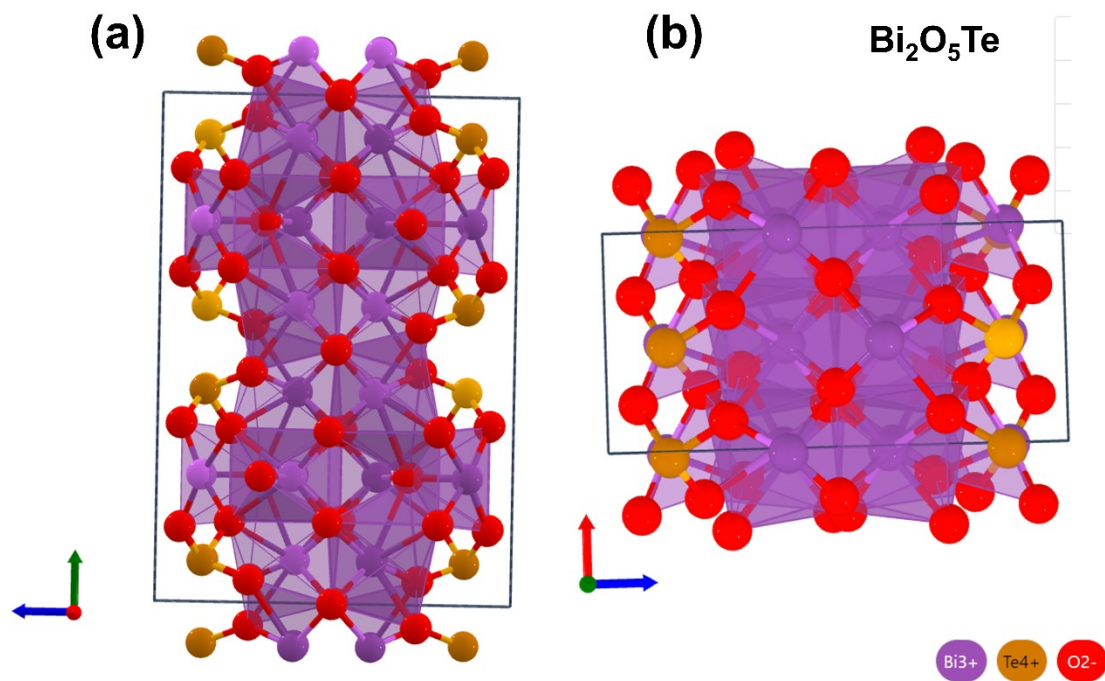

**Fig. S7** Atomic configuration of  $\text{Bi}_2\text{O}_5\text{Te}$  orthorhombic lattice phase (a) side view and (b) top view with  $Aem2$  space group where the unit cell is represented in solid-line box.<sup>2</sup>



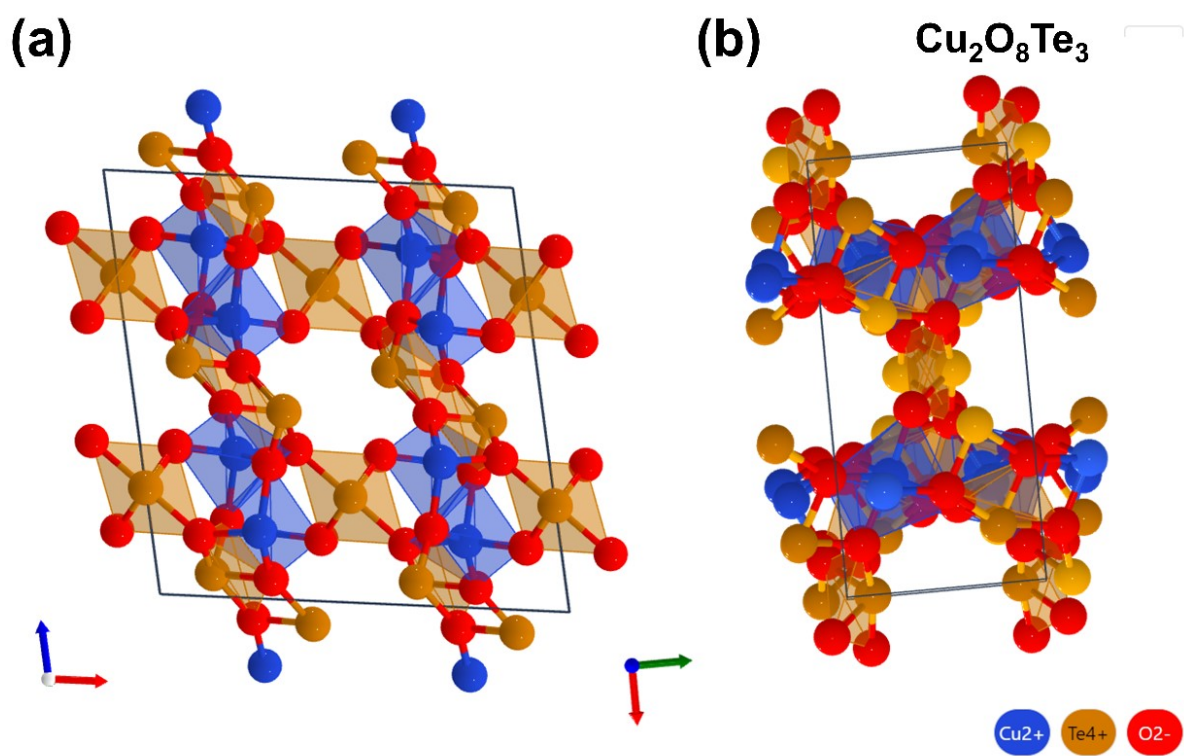

**Fig. S8** Atomic configuration of  $\text{Cu}_2\text{O}_8\text{Te}_3$  monoclinic crystal lattice system (a) side view and (b) top view with  $C2/c$  space group where the unit cell is exhibited by solid-line box.<sup>3</sup>

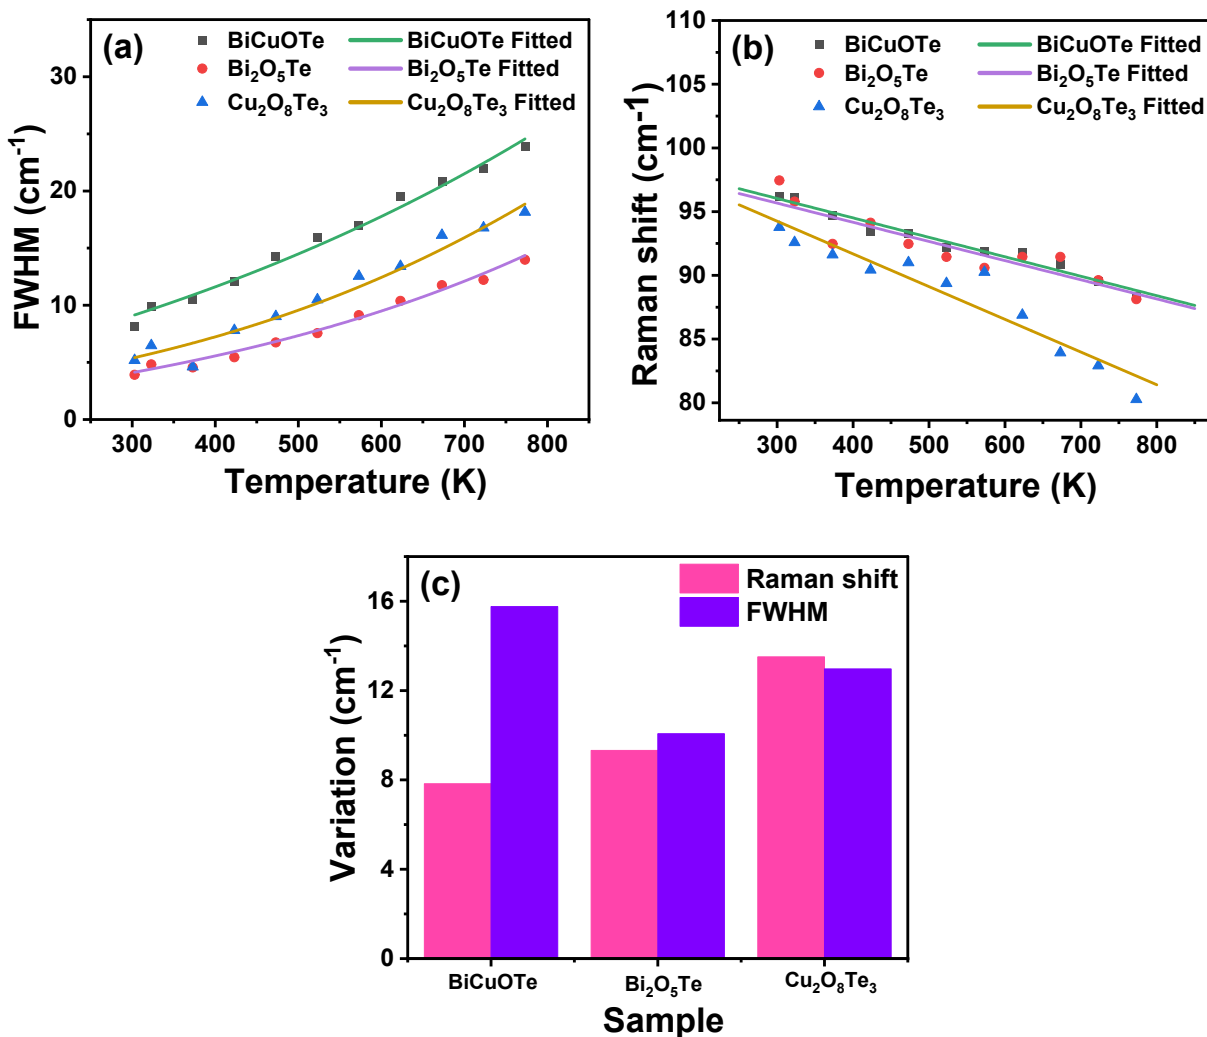

**Fig. S9** Comparative plot between (a) FWHM of Raman peaks with respect to temperature, (b) Raman shift against temperature for Raman peaks appeared within 90~96 cm<sup>-1</sup> and (c) statistical representation of the variation in Raman shift and FWHM of Raman peaks of each sample.

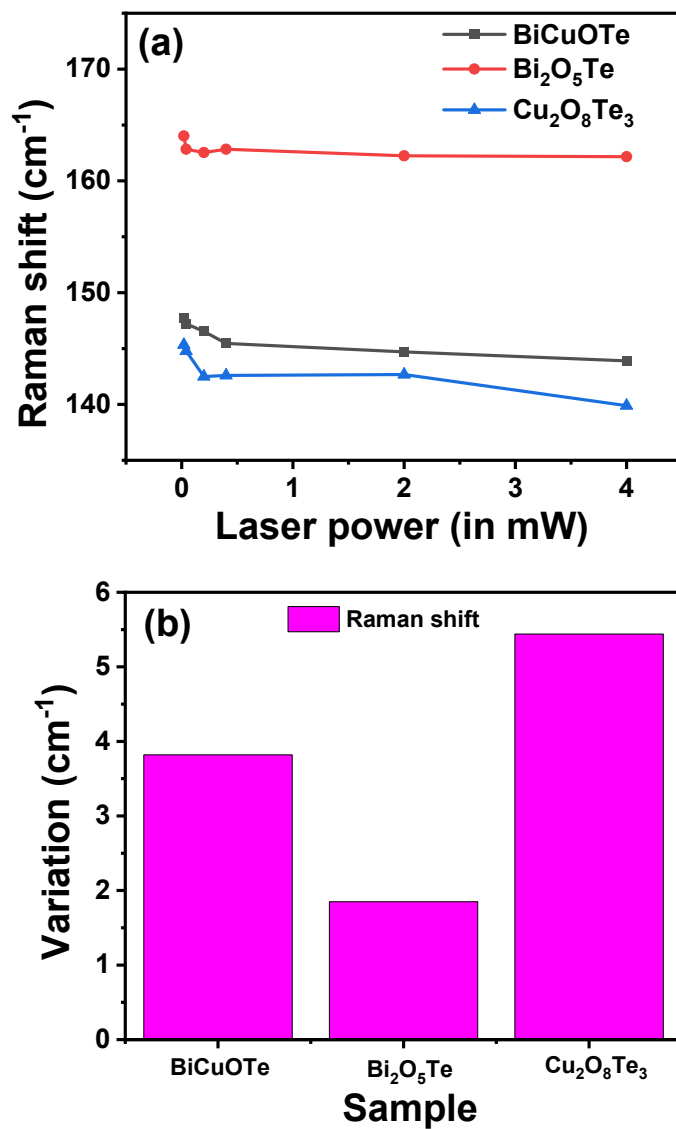

**Fig. S10** Comparative plot between (a) Raman shift against laser power for Raman peaks that appeared within 145~164 cm<sup>-1</sup> and (b) statistical representation of the variation in Raman shift of each sample.

## Notes and references

1 *Data retrieved from the Materials Project for CuBiTeO (mp-545369) from database version v2023.11.1.*

2 *Data retrieved from the Materials Project for Bi<sub>2</sub>TeO<sub>5</sub> (mp-23334) from database version v2023.11.1.*

3 *Data retrieved from the Materials Project for Cu<sub>2</sub>Te<sub>3</sub>O<sub>8</sub> (mp-17598) from database version v2023.11.1.*
